# Supplementary material for: Higher dietary salt intake is associated with microalbuminuria, but not with retinopathy in individuals with type 1 diabetes: the EURODIAB Prospective Complications Study
Source: PubMed Central journal article supplement (PMC4181505; doi:10.1007/s00125-014-3367-9), 2014-08-30
Supplement: 125_2014_3367_MOESM1_ESM.pdf [file 125_2014_3367_MOESM1_ESM.pdf]

**ESM table 1** Associations between ‘medium’ and ‘high’ dietary salt intake (vs. ‘low’ salt intake) and prevalent albuminuria and retinopathy

| model | salt intake  | Microalbuminuria<br>(205/1,068) |            |          | Macroalbuminuria<br>(143/1,006) |            |          | Non-proliferative retinopathy<br>(507/833) |            |          | Proliferative retinopathy<br>(224/550) |            |          |
|-------|--------------|---------------------------------|------------|----------|---------------------------------|------------|----------|--------------------------------------------|------------|----------|----------------------------------------|------------|----------|
|       |              | OR                              | 95% CI     | <i>p</i> | OR                              | 95% CI     | <i>p</i> | OR                                         | 95% CI     | <i>p</i> | OR                                     | 95% CI     | <i>p</i> |
| 1     | 7.5-10 g/day | 0.99                            | 0.65; 1.52 | 0.97     | 0.71                            | 0.44; 1.16 | 0.18     | 0.91                                       | 0.63; 1.31 | 0.60     | 1.01                                   | 0.65; 1.58 | 0.96     |
|       | >10 g/day    | 1.46                            | 1.00; 2.13 | 0.051    | 0.97                            | 0.63; 1.48 | 0.87     | 1.12                                       | 0.79; 1.57 | 0.52     | 0.86                                   | 0.56; 1.31 | 0.47     |
| 2     | 7.5-10 g/day | 1.01                            | 0.65; 1.57 | 0.97     | 0.80                            | 0.46; 1.38 | 0.42     | 0.85                                       | 0.58; 1.24 | 0.39     | 1.12                                   | 0.86; 1.47 | 0.66     |
|       | >10 g/day    | 1.42                            | 0.93; 2.15 | 0.10     | 1.02                            | 0.61; 1.70 | 0.95     | 0.96                                       | 0.66; 1.40 | 0.84     | 1.09                                   | 0.64; 1.84 | 0.75     |
| 3     | 7.5-10 g/day | 1.00                            | 0.64; 1.56 | 0.99     | 0.82                            | 0.47; 1.45 | 0.50     | 0.81                                       | 0.55; 1.20 | 0.30     | 1.13                                   | 0.67; 1.93 | 0.64     |
|       | >10 g/day    | 1.40                            | 0.92; 2.15 | 0.12     | 0.99                            | 0.57; 1.70 | 0.96     | 0.92                                       | 0.63; 1.36 | 0.69     | 1.05                                   | 0.60; 1.82 | 0.87     |

OR, odds ratio indicates the odds of prevalent albuminuria or retinopathy for salt intake of 7.5-10 and >10 g/day vs. salt intake of <7.5 g/day. Model 1: adjusted for age and sex; Model 2: model 1 + BMI, smoking (never, ex, current), urinary potassium excretion and use of antihypertensive medication; Model 3: model 2 + physical activity (0, ≤sex-specific median, >sex-specific median), total energy intake, protein intake, saturated fat intake, fibre intake, alcohol intake (0, ≤sex-specific median, >sex-specific median).
