# Supplementary material for: Higher dietary salt intake is associated with microalbuminuria, but not with retinopathy in individuals with type 1 diabetes: the EURODIAB Prospective Complications Study
Source: PubMed Central journal article supplement (PMC4181505; doi:10.1007/s00125-014-3367-9), 2014-08-30
Supplement: 125_2014_3367_MOESM2_ESM.pdf [file 125_2014_3367_MOESM2_ESM.pdf]

**ESM table 2** Associations between ‘medium’ and ‘high’ dietary salt intake (vs. ‘low’ salt intake) and prevalent albuminuria and retinopathy in individuals without CVD and who do not use antihypertensive medication

| model | salt intake  | Microalbuminuria<br>(116/794) |            |          | Macroalbuminuria<br>(41/719) |            |          | Non-proliferative retinopathy<br>(367/642) |            |          | Proliferative retinopathy<br>(92/367) |            |          |
|-------|--------------|-------------------------------|------------|----------|------------------------------|------------|----------|--------------------------------------------|------------|----------|---------------------------------------|------------|----------|
|       |              | OR                            | 95% CI     | <i>p</i> | OR                           | 95% CI     | <i>p</i> | OR                                         | 95% CI     | <i>p</i> | OR                                    | 95% CI     | <i>p</i> |
| 1     | 7.5-10 g/day | 0.96                          | 0.56; 1.65 | 0.87     | 0.98 <sup>a</sup>            | 0.41; 2.37 | 0.97     | 1.01                                       | 0.67; 1.52 | 0.97     | 1.37                                  | 0.73; 2.55 | 0.33     |
|       | >10 g/day    | 1.33                          | 0.81; 2.18 | 0.26     | 1.25 <sup>b</sup>            | 0.56; 2.77 | 0.59     | 0.99                                       | 0.68; 1.46 | 0.97     | 1.07                                  | 0.58; 1.98 | 0.83     |
| 2     | 7.5-10 g/day | 0.92                          | 0.53; 1.59 | 0.76     | 1.09 <sup>a</sup>            | 0.45; 2.68 | 0.85     | 0.94                                       | 0.62; 1.43 | 0.77     | 1.38                                  | 0.74; 2.60 | 0.31     |
|       | >10 g/day    | 1.19                          | 0.71; 2.02 | 0.51     | 1.35 <sup>b</sup>            | 0.58; 3.17 | 0.49     | 0.82                                       | 0.54; 1.24 | 0.34     | 1.09                                  | 0.57; 2.09 | 0.80     |
| 3     | 7.5-10 g/day | 0.94                          | 0.54; 1.64 | 0.83     | 1.19 <sup>a</sup>            | 0.47; 2.98 | 0.71     | 0.90                                       | 0.59; 1.39 | 0.64     | 1.42                                  | 0.73; 2.75 | 0.30     |
|       | >10 g/day    | 1.26                          | 0.74; 2.15 | 0.40     | 1.34 <sup>b</sup>            | 0.55; 3.27 | 0.52     | 0.77                                       | 0.50; 1.19 | 0.24     | 0.98                                  | 0.49; 1.97 | 0.95     |

OR, odds ratio indicates the odds of prevalent albuminuria or retinopathy for salt intake of 7.5-10 and >10 g/day vs. salt intake of <7.5 g/day. Model 1: adjusted for age and sex; Model 2: model 1 + BMI, smoking (never, ex, current), urinary potassium excretion and use of antihypertensive medication; Model 3: model 2 + physical activity (0, ≤sex-specific median, >sex-specific median), total energy intake, protein intake, saturated fat intake, fibre intake, alcohol intake (0, ≤sex-specific median, >sex-specific median).

<sup>a</sup>n=11 vs. 10 cases

<sup>b</sup>n=20 vs. 10 cases
